# Supplementary material for: Effects of Fast Simple Numerical Calculation Training on Neural Systems
Source: Neural Plast. 2016 Jan 6;2016:5940634. doi: 10.1155/2016/5940634 (PMC4736604; doi:10.1155/2016/5940634)

**Supplemental online material.**

**Supplemental Table 1.** Pre- and post-test scores for the psychological measures of the active control group from a previous study [1](Mean  $\pm$  SEM)

|                            | Active control  |                 | Planned Contrast in ANCOVA <sup>c</sup>   | <i>P</i> value <sup>c</sup><br>(uncorrected, corrected <sup>e</sup> ) |
|----------------------------|-----------------|-----------------|-------------------------------------------|-----------------------------------------------------------------------|
|                            | pre             | post            |                                           |                                                                       |
| Arithmetic                 |                 |                 |                                           |                                                                       |
| Simple arithmetic          | 33.0 $\pm$ 1.4  | 35.4 $\pm$ 0.9  | FSNC training >2 control <sup>d</sup>     | 7.31*10 <sup>-4</sup> , 0.005                                         |
| Complex arithmetic         | 7.06 $\pm$ 0.54 | 7.38 $\pm$ 0.67 | FSNC training >2 control                  | 0.034, 0.059                                                          |
| Non-verbal reasoning       |                 |                 |                                           |                                                                       |
| RAPM <sup>a</sup> (score)  | 29.1 $\pm$ 0.9  | 32.0 $\pm$ 0.8  | FSNC training >2 control                  | 0.270, 0.210                                                          |
| CCFT <sup>b</sup> (score)  | No data         | No data         | FSNC training >1 control                  | 0.754, 0.440                                                          |
| Working memory (WM)        |                 |                 |                                           |                                                                       |
| Digit span (score)         | No data         | No data         | FSNC training >1 control                  | 0.702, 0.440                                                          |
| Visuospatial WM            | No data         | No data         | FSNC training >1 control                  | 0.241, 0.210                                                          |
| Intelligence test with     |                 |                 |                                           |                                                                       |
| Tanaka B type              | No data         | No data         | FSNC training >1 control                  | 0.301, 0.211                                                          |
| Simple processing speed    |                 |                 |                                           |                                                                       |
| Word-Color task (items)    | 73.1 $\pm$ 1.7  | 79.3 $\pm$ 1.5  | FSNC training >2 control                  | 0.235, 0.210                                                          |
| Color-Word task (items)    | 52.9 $\pm$ 1.8  | 55.9 $\pm$ 1.6  | FSNC training >2 control                  | 0.018, 0.042                                                          |
| Executive function         |                 |                 |                                           |                                                                       |
| reverse Stroop task        | 62.0 $\pm$ 2.2  | 66.6 $\pm$ 1.6  | FSNC training >2 control                  | 0.009, 0.032                                                          |
| Stroop task (items)        | 49.0 $\pm$ 1.7  | 51.2 $\pm$ 1.5  | FSNC training >2 control                  | 0.061, 0.085                                                          |
| Creativity                 |                 |                 |                                           |                                                                       |
| S-A creativity test (total | 26.9 $\pm$ 1.7  | 27.3 $\pm$ 1.5  | two-tailed (FSNC training vs. 2 controls) | 0.109, 0.127                                                          |

grade)

---

Data are reported as the mean  $\pm$  SEM

a. Raven's Advanced Progressive Matrices

b. Cattell's Culture Fair Test

c. One-way ANCOVAs with test-retest differences were performed with psychological measures as dependent variables and pretest scores on the psychological measures as covariates. When there were data from three control groups, the comparisons were performed between the FSNC training group and the three control groups. When there were data from only one control group, the comparisons were performed between the FSNC training group and the control group.

d. The no-intervention group in the experiment of the present study and the active control group from the previous study.

e. P values of results that were corrected for multiple comparisons using FDR.

### **Supplemental Figure legend**

**Supplemental Fig. 1.** Schema of tasks used in this study. There were two control tasks (a word-color task and a color-word task), a reverse Stroop task, and a Stroop task. This figure is reproduced from our previous publication [2].

**Supplemental Fig. 2.** Areas of analyses of regional cerebral blood flow during rest (resting rCBF). Because of the area limitations of the scanning method, only parts of brain were scanned and analyzed. Black regions are areas analyzed for resting rCBF, as displayed on the glass brain.

### **References**

1. Takeuchi H, Taki Y, Sassa Y, Hashizume H, Sekiguchi A, et al. (2011) Working memory training using mental calculation impacts regional gray matter of the frontal and parietal regions. PLoS ONE 6: e23175.
2. Takeuchi H, Taki Y, Sassa Y, Hashizume H, Sekiguchi A, et al. (2012) Regional gray and white matter volume associated with Stroop interference: Evidence from voxel-based morphometry. Neuroimage 59: 2899-2907.

Supplemental Fig. 1.

|                         |                           |        |       |       |       |
|-------------------------|---------------------------|--------|-------|-------|-------|
|                         | questions: answer options |        |       |       |       |
| 1 . Word-Color task     | blue                      |        |       | v     |       |
| 2 . Reverse Stroop task | blue                      |        |       | v     |       |
| 3 . Color-Word task     | yellow                    | blue   | green | black | red   |
| 4 . Stroop task         | blue                      | yellow | blue  | green | black |

**Supplemental Fig. 2.**

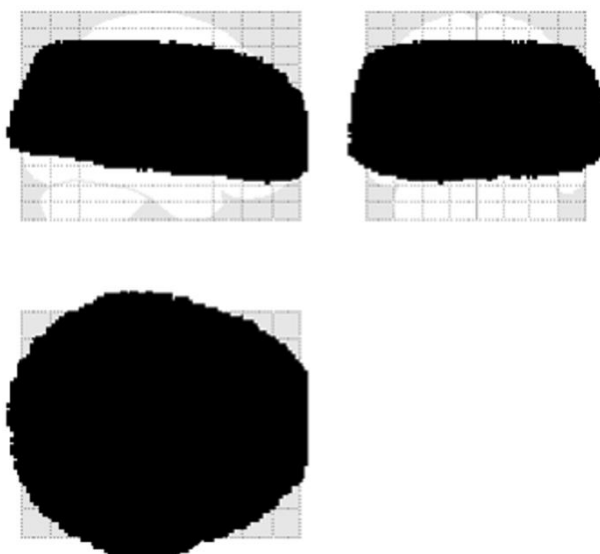

Supplement: Supplementary file 1 — Supplementary materials contain the table which described the data of the active control group in our previous study (Supplemental Table 1), the figure which showed the schema of the stroop tasks that we used (Supplemental Figure 1), and the figure which showed the areas of regional cerebral blood flow during rest (Supplemental figure 2). [file 5940634.f1.pdf]
